# Supplementary figures and images for: MicroRNAs Present in Malignant Pleural Fluid Increase the Migration of Normal Mesothelial Cells In Vitro and May Help Discriminate between Benign and Malignant Effusions
Source: MDPI journal article supplement (doi:10.3390/ijms241814022), 2023-09-13

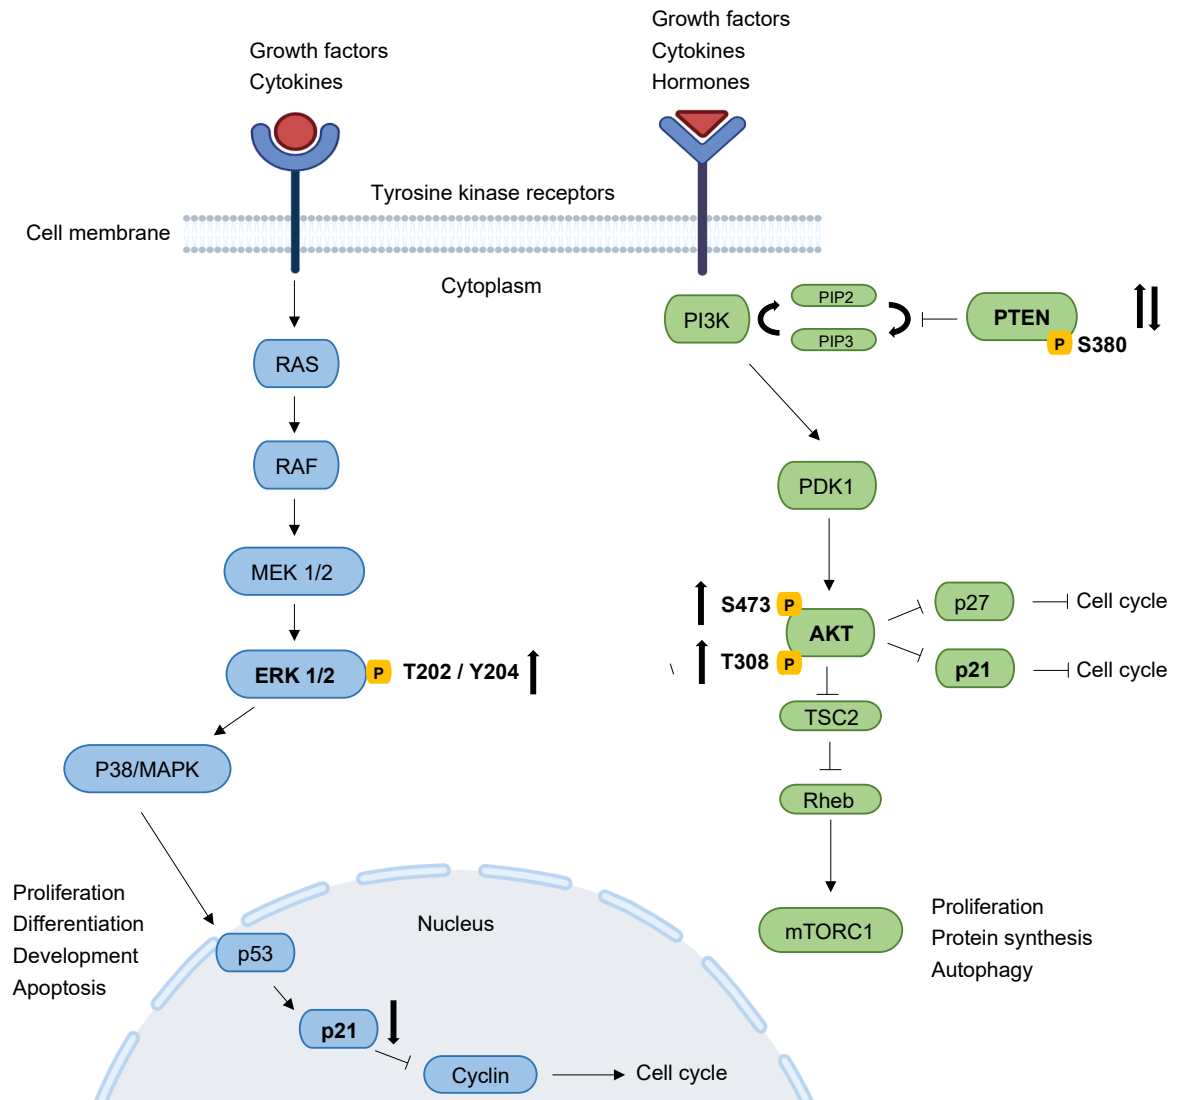

Supplement: s1 [file s1]

**B1 versus M5**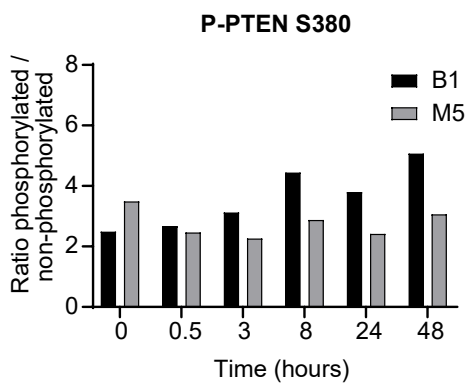**B2 versus M12**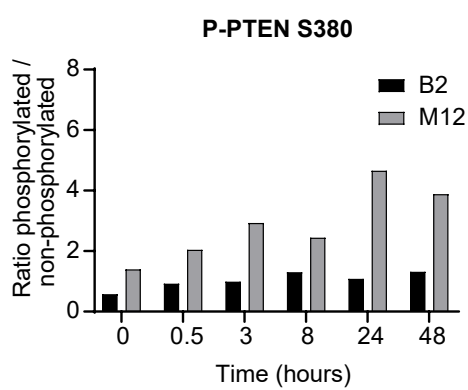**B3 versus M9**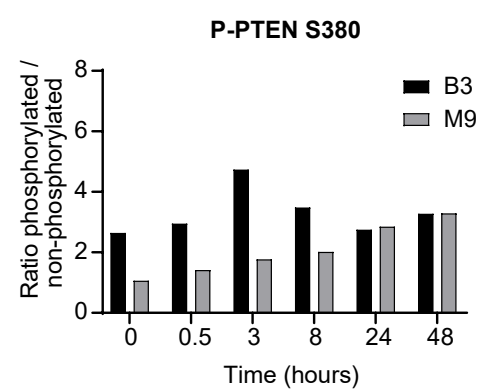**P-AKT S473**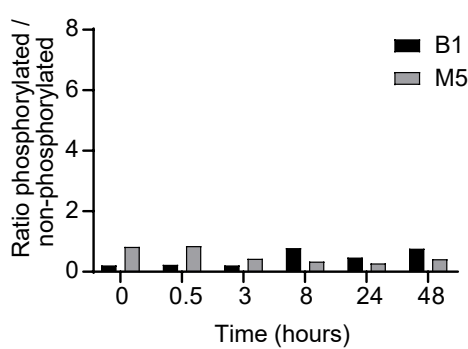**P-AKT S473**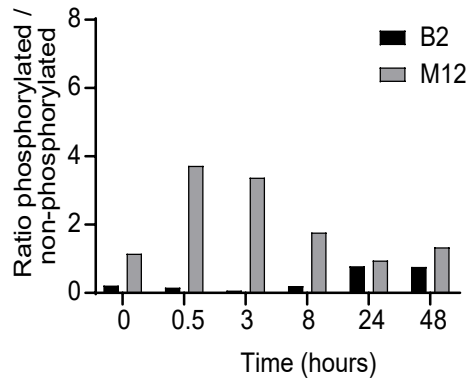**P-AKT S473**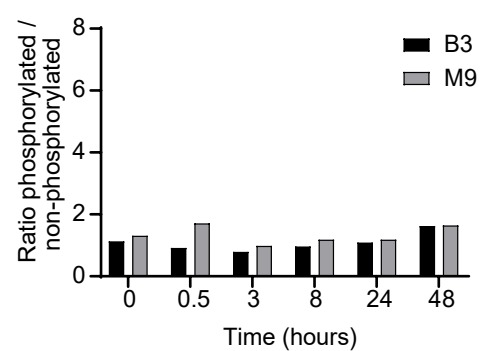**P-AKT T308**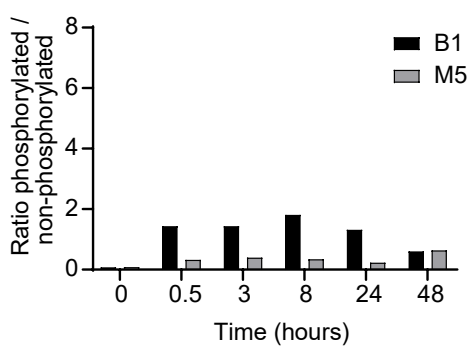**P-AKT T308**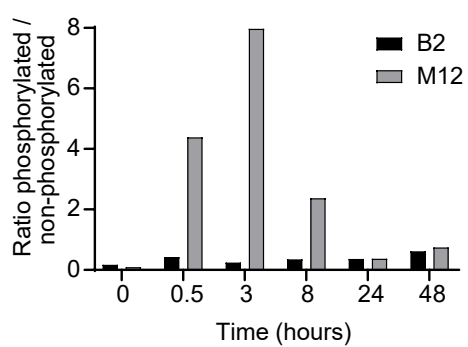**P-AKT T308**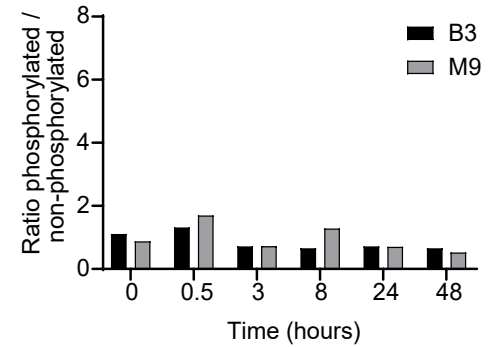**P-MAPK T202/Y204**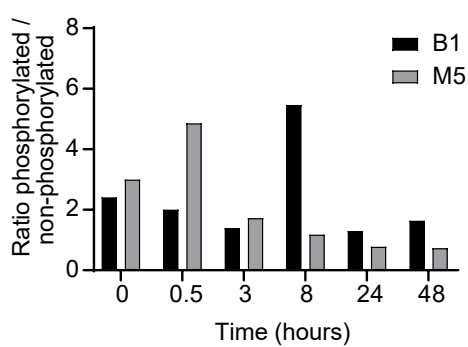**P-MAPK T202/Y204**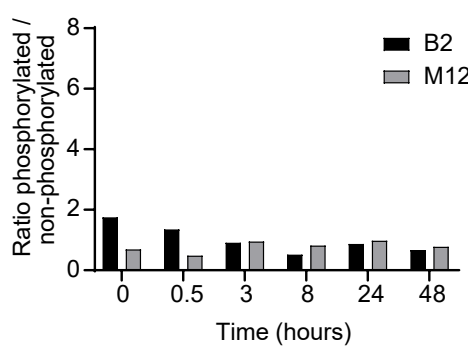**P-MAPK T202/Y204**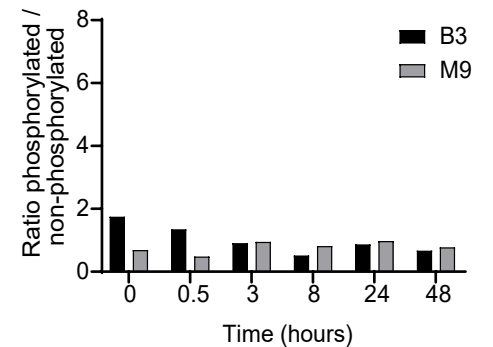

Supplement: s1 [file s1]

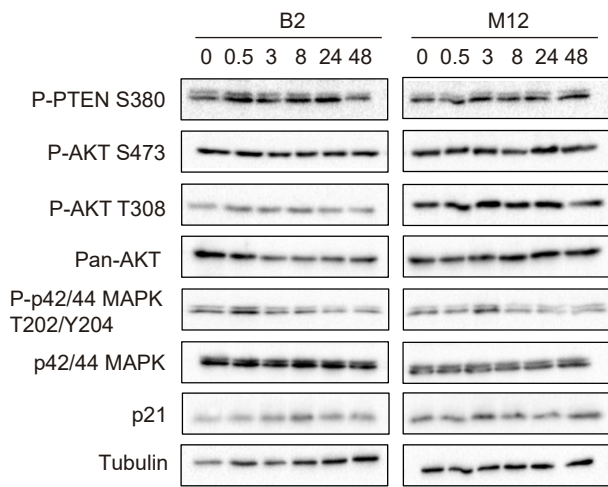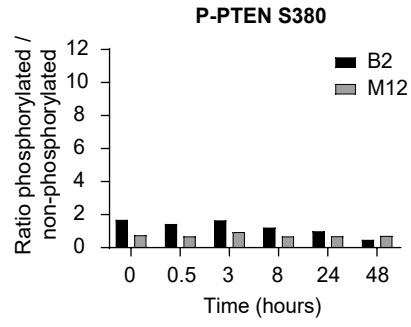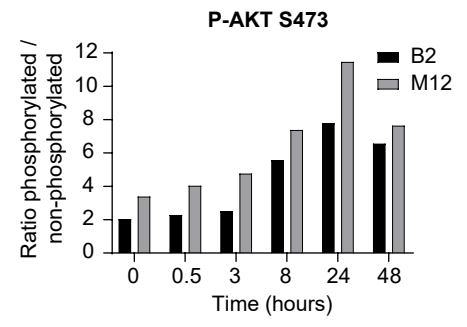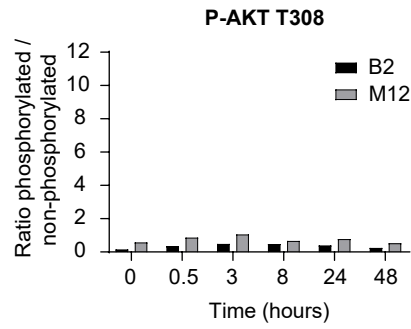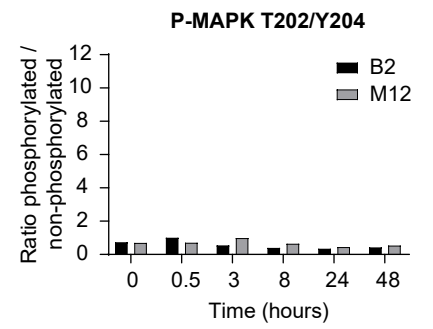

Supplement: s1 [file s1]

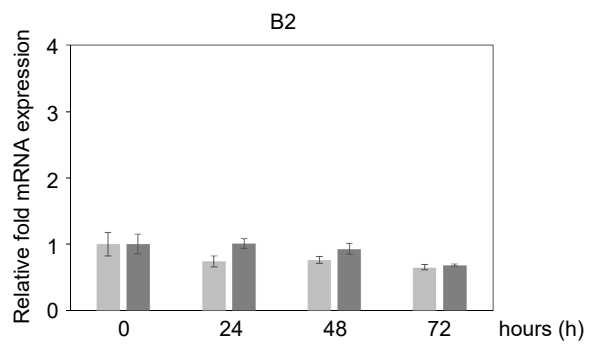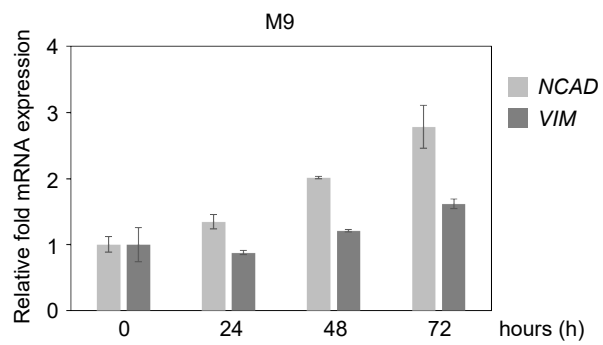

Supplement: s1 [file s1]

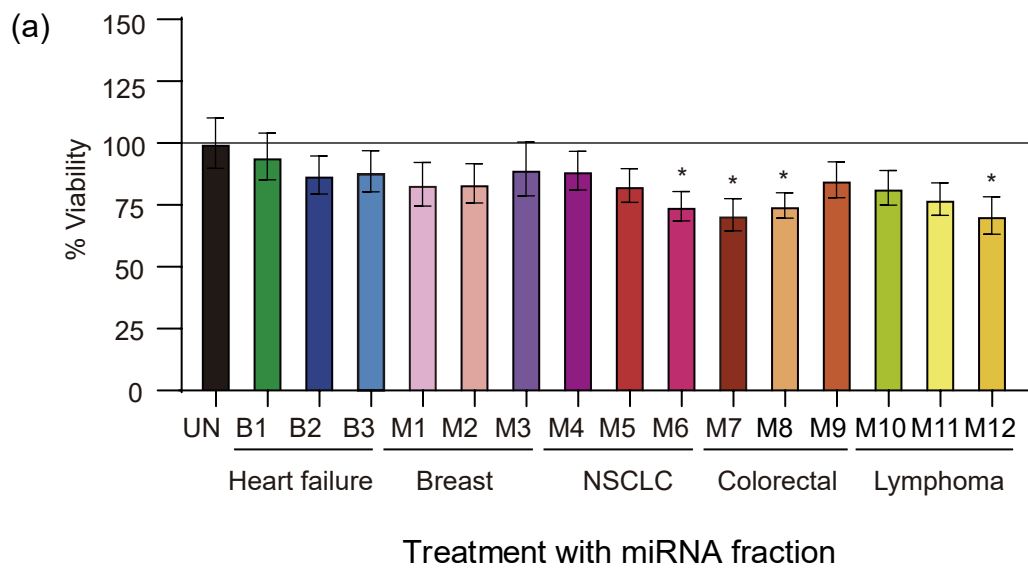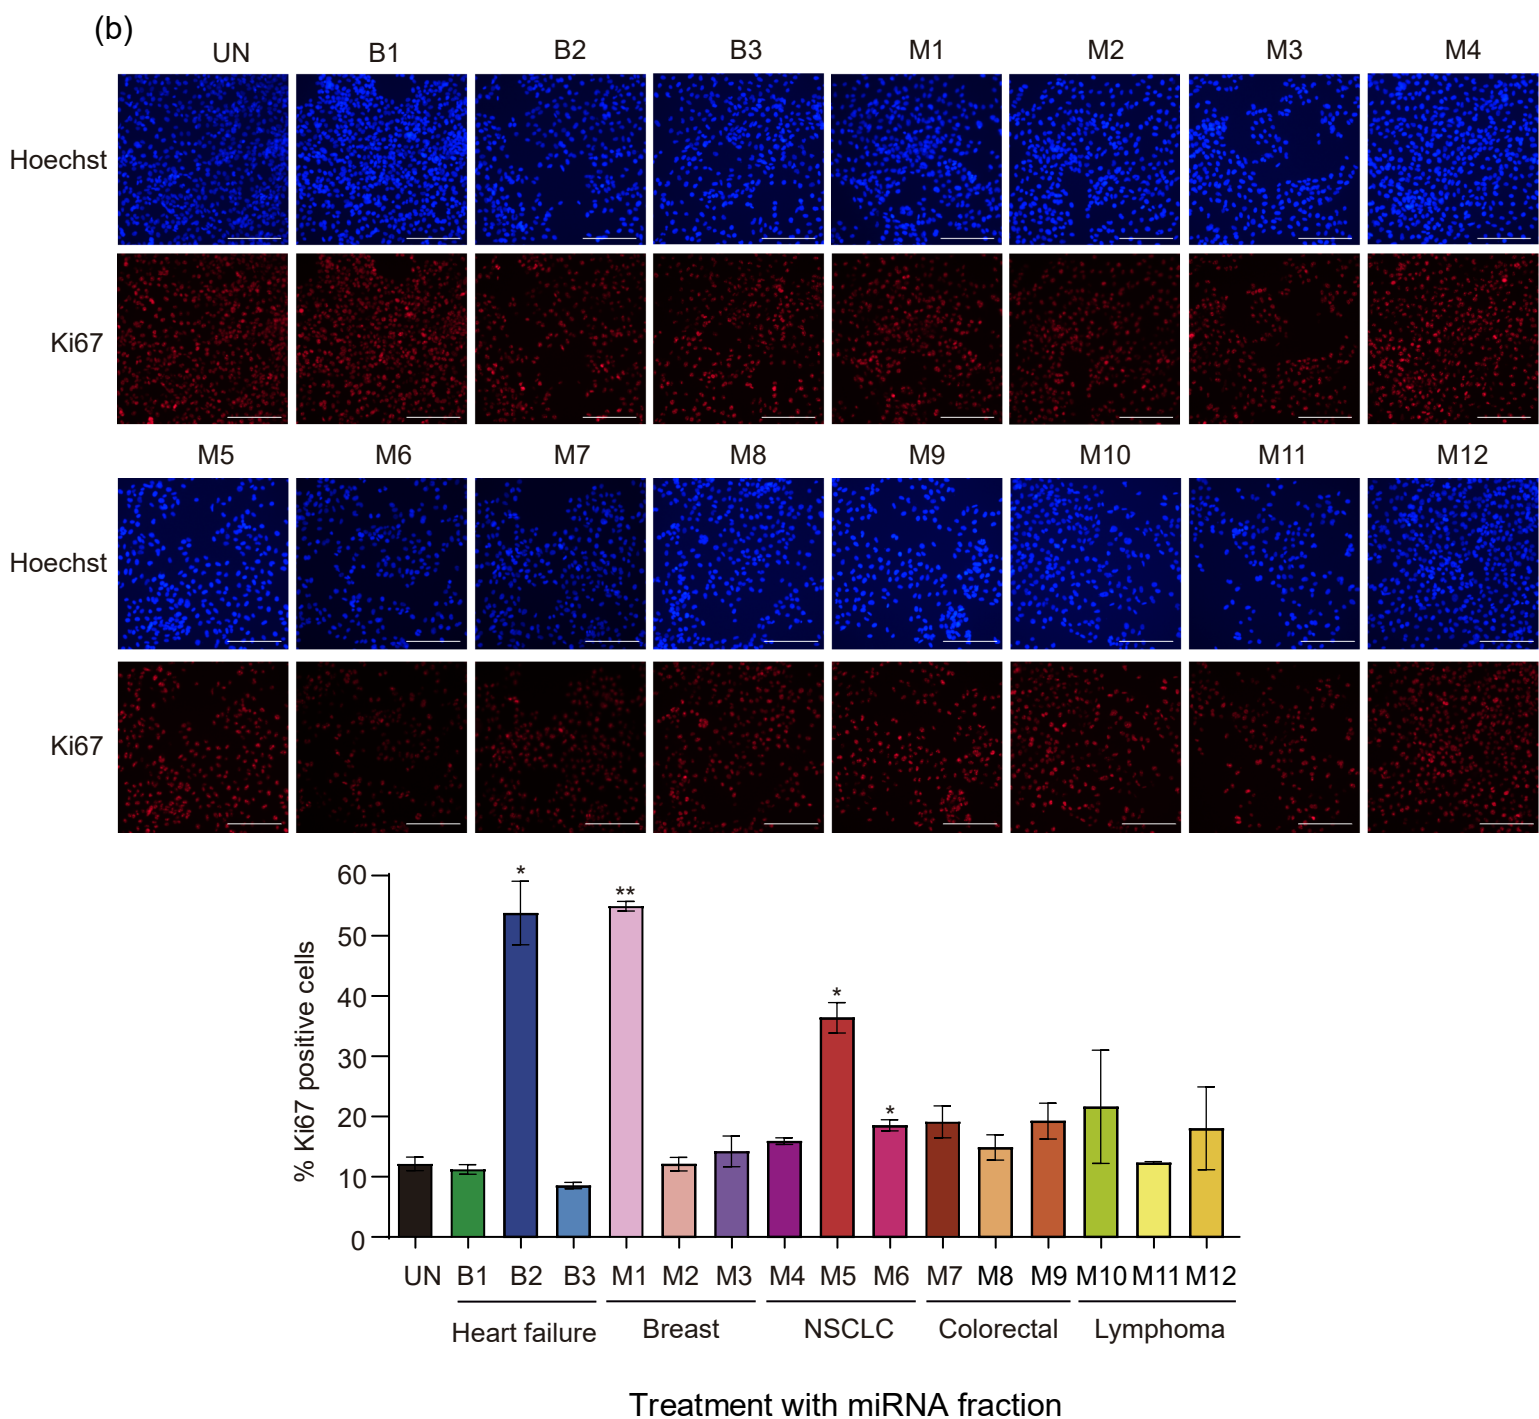

Supplement: s1 [file s1]
